# Supplementary material for: Thermal/Electrical Properties and Texture of Carbon Black PC Polymer Composites near the Electrical Percolation Threshold
Source: MDPI journal article supplement (doi:10.3390/jcs5080212), 2021-08-11
Supplement: s1 [file s1]

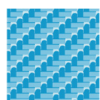

# Supplementary Materials: Thermal/Electrical Properties and Texture of Carbon Black PC Polymer Composites near the Electrical Percolation Threshold

Valentina Brunella, Beatrice Gaia Rossatto, Chiara Mastropasqua, Federico Cesano and Domenica Scarano

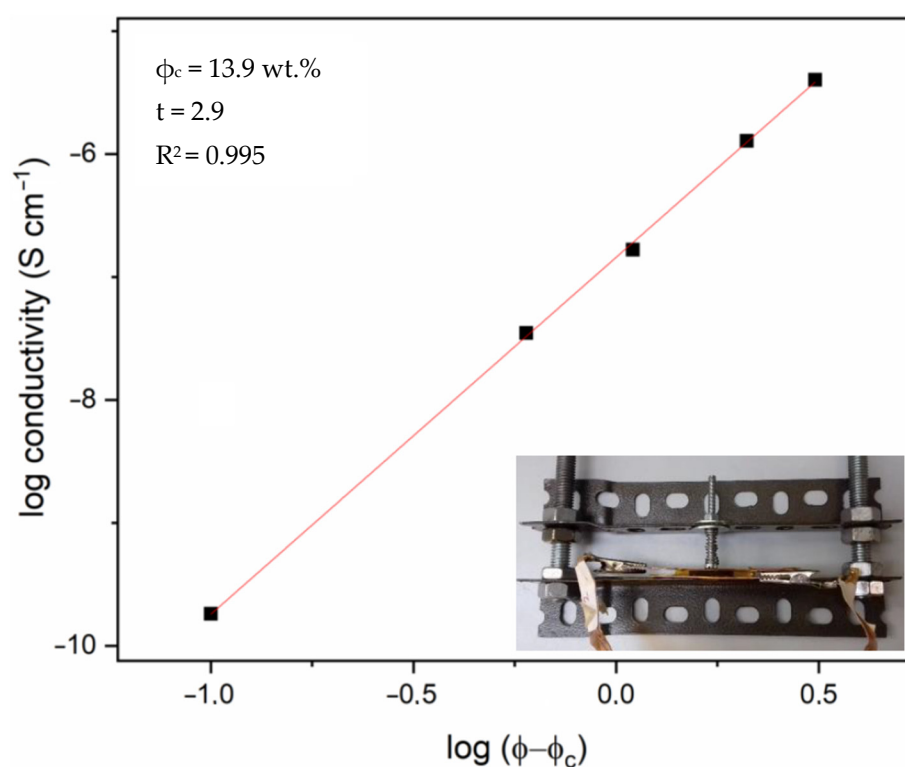

**Figure S1.** Log-log conductivity plot at 25°C as a function of the  $(\phi - \phi_c)$ . In the inset, the experimental setup to measure the resistance is illustrated.

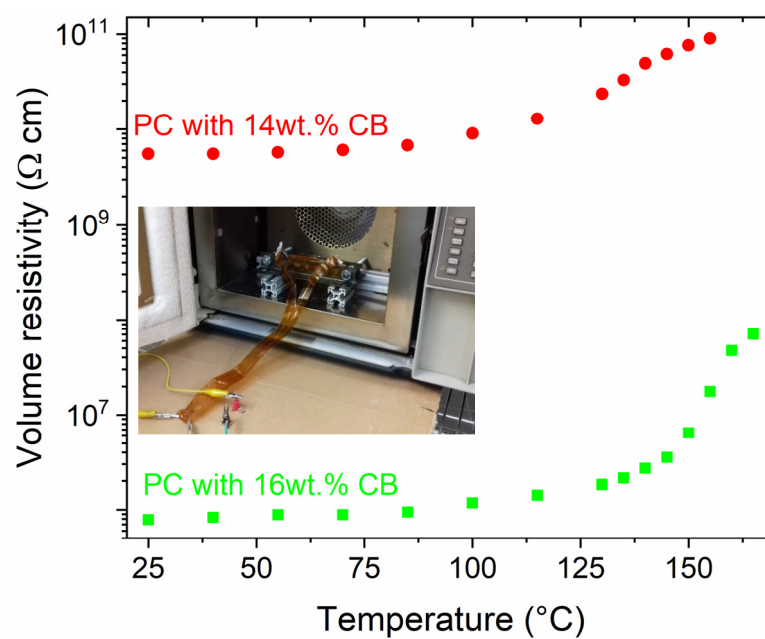

**Figure S2.** Through-plane DC electrical conductivity as a function of temperature for CB-filled melt-compounded PC composites. In the inset, the experimental setup to measure the resistance versus the temperature is illustrated.
