# Supplementary material for: Thermal/Electrical Properties and Texture of Carbon Black PC Polymer Composites near the Electrical Percolation Threshold
Source: MDPI journal article supplement (doi:10.3390/jcs5080212), 2021-08-11
Supplement: s1 [file s1]

Archive with 1 entries (1 files):
- jcs-1306349-supplementary.pdf
